# Supplementary material for: Accuracy of Real-Time Polymerase Chain Reaction in COVID-19 Patients
Source: PubMed Central journal article supplement (PMC8849071; doi:10.1128/spectrum.00591-21), 2022-02-16
Supplement: spectrum00591-21_supp_1_seq4.pdf [file spectrum00591-21_supp_1_seq4.pdf]

Supplementary Materials

1  
2

3 **Supplementary Figures**

4 Figure S1. The specificity and sensitivity of RT-qPCR with the in-house-designed *NP* gene  
5 primer set (iNP) in nasopharyngeal vs. sputum samples and oropharyngeal vs. saliva samples.

6  
7  
8

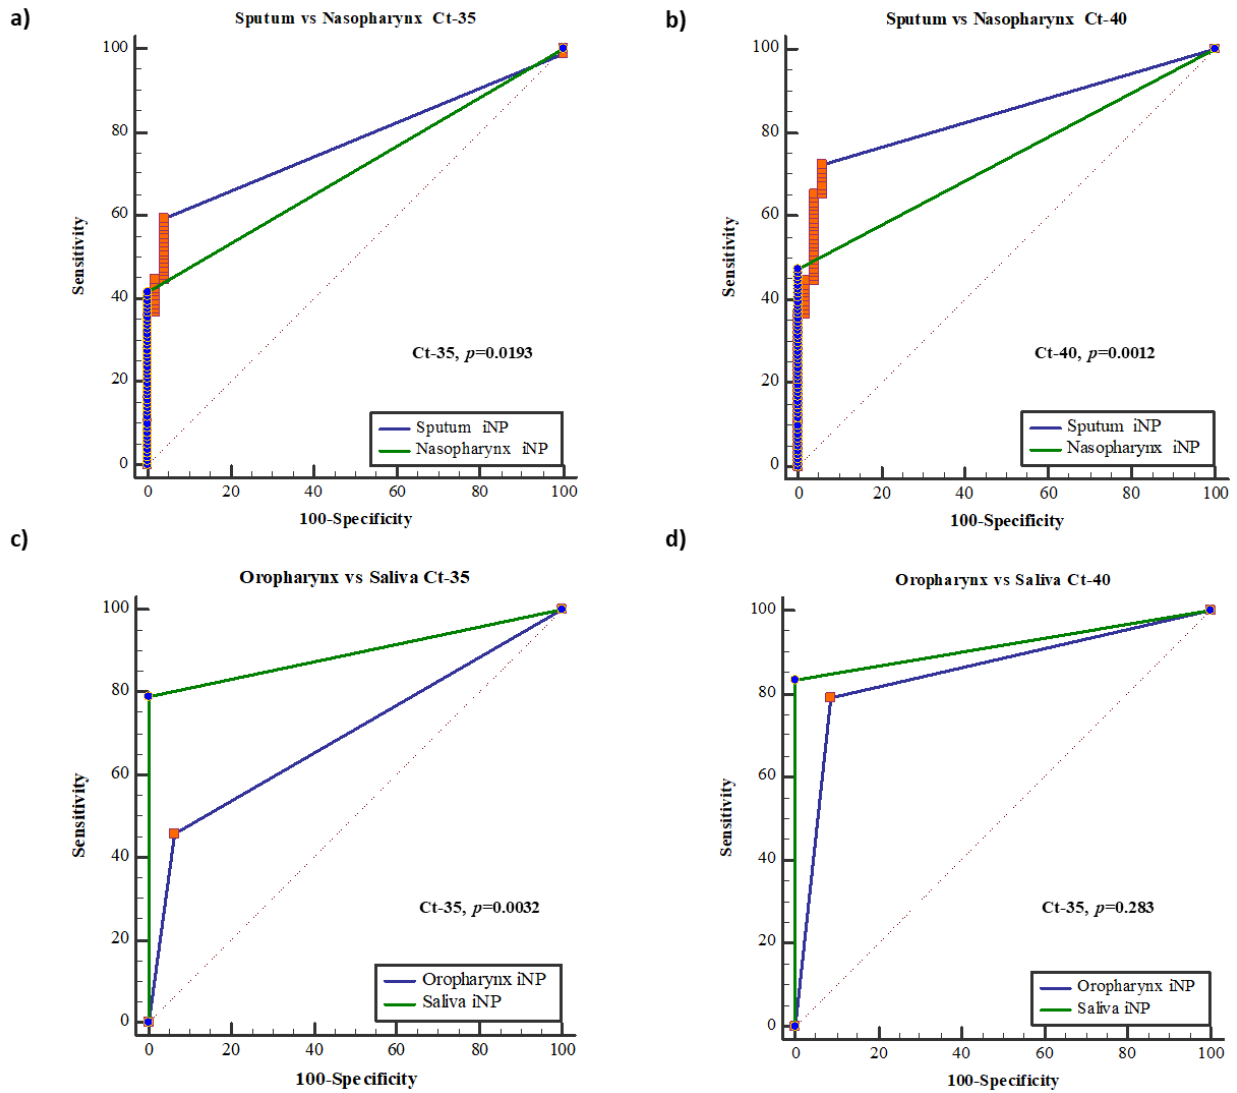

9  
10  
11  
12  
13  
14  
15  
16  
17  
18  
19  
20  
21  
22  
23  
24

25  
26  
27  
28  
29  
30  
31  
32  
33  
34  
35  
36  
37  
38  
39  
40  
41  
42  
43  
44  
45  
46  
47  
48  
49  
50

**Supplementary Figure 1**

The specificity and sensitivity of RT-qPCR with the in-house–designed *NP* gene primer set (iNP) in nasopharyngeal vs. sputum samples and oropharyngeal vs. saliva samples.

- a) Determination of specificity and sensitivity in selected sputum vs. nasopharyngeal samples at a  $C_t$  cutoff of 35 ( $C_t$ -35).
- b) Determination of specificity and sensitivity in selected sputum vs. nasopharyngeal samples at a  $C_t$  cutoff of 40 ( $C_t$ -40).
- c) Determination of specificity and sensitivity in selected (first week) oropharyngeal vs. saliva samples at a  $C_t$  cutoff of 35 ( $C_t$ -35).
- d) Determination of specificity and sensitivity in selected (first week) oropharyngeal vs. saliva samples at a  $C_t$  cutoff of 40 ( $C_t$ -40).

51

52

53

54

55

56 **Table S1.** All primers, probe, and PCR conditions used in this study.

57

58

59

60

61

62

63

64

65

66

67

68

69

70

71

72

73

74

75

76

| Primer source     | Target gene      | Primer name                    | Primer sequence                       | Target      | PCR condition                                                                                                                                                            |
|-------------------|------------------|--------------------------------|---------------------------------------|-------------|--------------------------------------------------------------------------------------------------------------------------------------------------------------------------|
| <b>WHO primer</b> | <b>RdRp gene</b> | RdRP_SARSr-F2                  | GTGARATGGTCATGTGTGGCGG                | Pan Sarbeco |                                                                                                                                                                          |
|                   |                  | RdRP_SARSr-R1                  | CARATGTTAAASACTATTAGCATA              |             |                                                                                                                                                                          |
|                   |                  | RdRP_SARSr-P1                  | [TET]CCAGGTGGWACRTCATCMGGTGATGC[BHQ1] |             |                                                                                                                                                                          |
| <b>CDC primer</b> | <b>N gene 1</b>  | 2019-nCoV_N1-F                 | GACCCCAAATCAGCGAAAT                   | SARS-CoV2   | 50°C for 10 min, 1 cycle for Reverse transcription. 95°C 30sec for 1 cycle for pre incubation, 95°C 5sec for and 57°C for amplification and data detection for 45 cycles |
|                   |                  | 2019-nCoV_N1-R                 | TCTGGTTACTGCCAGTTGAATCTG              |             |                                                                                                                                                                          |
|                   |                  | 2019-nCoV_N1-P                 | [FAM]ACCCCGCATTACGTTTGGTGGACC[BHQ1]   |             |                                                                                                                                                                          |
| <b>CDC primer</b> | <b>N gene 2</b>  | 2019-nCoV_N2-F                 | TTACAAACATTGGCCGCAAA                  | SARS-CoV2   |                                                                                                                                                                          |
|                   |                  | 2019-nCoV_N2-R                 | GCGCGACATTCCGAAGAA                    |             |                                                                                                                                                                          |
|                   |                  | 2019-nCoV_N2-P                 | [FAM]ACAATTTGCCCCAGCGCTTCAG[BHQ1]     |             |                                                                                                                                                                          |
| <b>CDC primer</b> | <b>N gene 3</b>  | 2019-nCoV_N3-F                 | GGGAGCCTTGAATACACCAAAA                | SARS-CoV2   |                                                                                                                                                                          |
|                   |                  | 2019-nCoV_N3-R                 | TGTAGCACGATTGCAGCATTG                 |             |                                                                                                                                                                          |
|                   |                  | 2019-nCoV_N3-P                 | [FAM]AYCACATTGGCACCCGCAATCCTG[BHQ1]   |             |                                                                                                                                                                          |
| <b>This study</b> | <b>iNP gene</b>  | nCov-NP_572F                   | GCAACAGTTCAAGAAATTC                   | SARS-CoV2   | 59°C for amplification and the rest is same like above                                                                                                                   |
| <b>Kogene Kit</b> | <b>E gene</b>    | Primer/Probe mix 1 (E-gene)    | Manufacturer's trade mark             | SARS-CoV2   | As per Manufacturer's instructions                                                                                                                                       |
|                   | <b>RdRp gene</b> | Primer/Probe mix 2 (RdRp gene) | Manufacturer's trade mark             | SARS-CoV2   | As per Manufacturer's instructions                                                                                                                                       |

77

78 **Table S2.** Diagnostic characteristics of negative control samples.

79

80

81

82

83

84

85

| Diagnostic characteristics    | Negative samples |        |            |        |
|-------------------------------|------------------|--------|------------|--------|
|                               | Nasopharynx      | Sputum | Oropharynx | Saliva |
| No. of samples                | 55               | 21     | 24         | 28     |
| NP-gene (iNP) RT-PCR          | ND               | ND     | ND         | ND     |
| E-gene (Kogene kit) RT-PCR    | ND               | ND     | ND         | ND     |
| RdRp-gene (Kogene kit) RT-PCR | ND               | ND     | ND         | ND     |
| WHO RdRp Primers RT-PCR       | ND               | ND     | ND         | ND     |
| CDC N1 primers RT-PCR         | ND               | ND     | ND         | ND     |
| CDC N2 primers RT-PCR         | 2 (+)            | 2 (+)  | 1 (+)      | 1 (+)  |
| CDC N3 primers RT-PCR         | ND               | ND     | ND         | ND     |

86

87

88

Fifty-five nasopharyngeal, 21 sputum, 24 oropharyngeal, and 28 saliva samples were obtained from health checkup subjects with no clinical symptoms, no increase in a SARS-CoV-2 antibody titer, or no contact with confirmed COVID-19 patients. Cycle threshold >35 indicates a negative result; ND: not detectable; 2(+): two SARS-CoV-2-positive samples; 1(+): one virus-positive sample

89

90

91

92

93 **Table S3.** Clinical and subclinical characteristics of all COVID-19 patients

| Patient | Gender/<br>Age | Underlying<br>Comorbidity                              | Symptoms &<br>signs               | IFA                             |                                 |                                          | ELISA                                    |                                            |     | Cell culture |
|---------|----------------|--------------------------------------------------------|-----------------------------------|---------------------------------|---------------------------------|------------------------------------------|------------------------------------------|--------------------------------------------|-----|--------------|
|         |                |                                                        |                                   | IgG titer<br>Initial/ Follow-up | IgM titer<br>Initial/ Follow-up | IgM antibody titer<br>Initial/ Follow-up | IgG antibody titer<br>Initial/ Follow-up | Total antibody titer<br>Initial/ Follow-up |     |              |
| 1       | M/46           | HTN,<br>dyslipidemia                                   | coughing, chill                   | <1:32/1:256                     | <1:32/<1:32                     | <1:128/1:512                             | <1:128/1:4096                            | <1:128/1:4096                              | (+) |              |
| 2       | M/30           | HTN                                                    | coughing, sore<br>throat<br>chill | <1:32/1:128                     | <1:32/<1:32                     | <1:128/<1:128                            | <1:128/1:512                             | <1:128/1:512                               | (+) |              |
| 3       | F/79           | HTN,DM,<br>dyslipidemia,<br>Guillain-Barre<br>syndrome | dyspnea                           | <1:32/1:1,024                   | <1:32/<1:32                     | <1:128/1:512                             | <1:128/1:2048                            | <1:128/1:2048                              | (+) |              |
| 4       | M/30           | None                                                   | febrile sense                     | <1:32/1:128                     | <1:32/<1:32                     | <1:128/1:128                             | <1:128/1:1024                            | <1:128/1:1024                              | (+) |              |
| 5       | F/29           | None                                                   | sore throat,<br>myalgia<br>chill  | <1:32/1:64                      | <1:32/<1:32                     | <1:128/<1:128                            | <1:128/1:128                             | <1:128/<1:128                              | (+) |              |
| 6       | M/74           | HTN,DM,<br>dyslipidemia                                | sore throat,<br>rhinorrhea        | 1:256/1:1,024                   | <1:32/<1:32                     | 1:128/1:256                              | 1:512/1:8192                             | 1:512/1:4096                               | (-) |              |
| 7       | F/75           | HTN,<br>dyslipidemia                                   | fever, sore<br>throat             | <1:32/>1:1,024                  | <1:32/1:32                      | <1:128/1:128                             | <1:128/1:1024                            | <1:128/1:1024                              | (-) |              |
| 8       | M/79           | HTN,DM                                                 | fever, headache                   | <1:32/1:128                     | <1:32/<1:32                     | <1:128/1:256                             | <1:128/1:8192                            | <1:128/1:4096                              | (-) |              |
| 9       | F/61           | None                                                   | fever, coughing                   | <1:32/1:256                     | <1:32/<1:32                     | <1:128/1:1024                            | 1:256/1:16384                            | 1:128/1:8192                               | (-) |              |
| 10      | M/36           | None                                                   | sore throat,<br>headache<br>chill | <1:32/1:128                     | <1:32/<1:32                     | <1:128/<1:128                            | <1:128/1:128                             | <1:128/1:128                               | (-) |              |
| 11      | F/29           | None                                                   | No symptoms                       | 1:64/1:64                       | <1:32/<1:32                     | <1:128/<1:128                            | <1:128/1:128                             | <1:128/<1:128                              | (-) |              |
| 12      | M/22           | None                                                   | No symptoms                       | 1:64/1:64                       | <1:32/<1:32                     | <1:128/<1:128                            | <1:128/1:128                             | <1:128/1:128                               | (-) |              |

94

95 HTN, hypertension; DM, diabetes mellitus. The IFA titer was measured by serial dilution of a patient's serum, and the IgG titer cutoff was  $\geq 1:32$ . Antibody titer detection was performed  
96 (with serial dilution) by an indirect ELISA at OD<sub>450</sub> against a recombinant SARS-CoV-2 nucleoprotein; the cutoff titer for IgM was 0.5; for IgG, it was 1.1; and for total Ig, it was 0.7

97

98

99

100

101 **Table S4.** RT-PCR results on SARS-CoV-2 in all clinical samples for primer set iNP and primer sets targeting the *E* and  
 102 *RdRp* genes (Kogene Kit).

103

| 104 | <b>Specimens and values</b>       | <b>Nasopharynx<br/>(N=101)</b> | <b>Oropharynx<br/>(N=90)</b> | <b>Sputum<br/>(N=106)</b> | <b>Pla/Ser/WB<br/>(N=77)</b> | <b>Saliva<br/>(N=69)</b> | <b>Stool<br/>(N=55)</b> | <b>Urine<br/>(N=92)</b> |
|-----|-----------------------------------|--------------------------------|------------------------------|---------------------------|------------------------------|--------------------------|-------------------------|-------------------------|
| 105 | <b>NP-gene<br/>(iNP)</b>          |                                |                              |                           |                              |                          |                         |                         |
|     | Positive test results, No%        | 42 (44.68%)                    | 21 (23.59%)                  | 61 (57.54%)               | 5 (6.32%)                    | 32(46.37%)               | 6 (10.90%)              | 1 (1.08%)               |
| 106 | Cycle threshold, Mean (SD)        | 26.13 (13.5)                   | 29.39 (4.4)                  | 27.26 (5.1)               | 30.39 (3.01)                 | 28.47 (4.1)              | 29.62 (3.5)             | NA                      |
| 107 | Ct range                          | 10.04 - 34.94                  | 14.94 - 33.96                | 14.94 -33.96              | 27.49 - 33.91                | 21.60 – 34.69            | 25.34 – 34.15           | NA                      |
| 108 | Sensitivity/Specificity           | 43.1%/100%                     | 24.3%/100%                   | 58.1%/100%                |                              | 43.3%/100%               |                         |                         |
|     | 95% CI                            | 0.628 - 0.779                  | 14.77 - 32.95                | 0.709 - 0.841             | 2.56 - 14.08                 | 0.644 - 0.808            | 3.64 - 20 .0            | NA                      |
| 109 | <b>Specimens and values</b>       | <b>Nasopharynx<br/>(N=97)</b>  |                              | <b>Sputum<br/>(N=104)</b> |                              |                          |                         |                         |
| 110 | <b>E-gene<br/>(Kogene kit)</b>    |                                |                              |                           |                              |                          |                         |                         |
|     | Positive test results, No%        | 38 (39.17%)                    |                              | 49 (47.11%)               |                              |                          |                         |                         |
| 111 | Cycle threshold, mean (SD)        | 25.39 (5.2)                    |                              | 27.83 (5.0)               |                              |                          |                         |                         |
| 112 | Ct range                          | 12.88 – 34.33                  |                              | 13.76 - 34.93             |                              |                          |                         |                         |
| 113 | Sensitivity/Specificity           | 36.5%/100%                     |                              | 46.1%/100%                |                              |                          |                         |                         |
|     | 95% CI                            | 0.593 - 0.750                  |                              | 0.638 - 0.784             |                              |                          |                         |                         |
| 114 | <b>Specimens and values</b>       | <b>Nasopharynx<br/>(N=97)</b>  |                              | <b>Sputum<br/>(N=104)</b> |                              |                          |                         |                         |
| 115 | <b>RdRp-gene<br/>(Kogene kit)</b> |                                |                              |                           |                              |                          |                         |                         |
|     | Positive test results, No%        | 37 (38.18%)                    |                              | 47 (45.19%)               |                              |                          |                         |                         |
| 116 | Cycle threshold, Mean (SD)        | 25.62(5.2)                     |                              | 27.96 (5.0)               |                              |                          |                         |                         |
| 117 | Ct range                          | 13.40 - 33.68                  |                              | 14.17 – 34.68             |                              |                          |                         |                         |
| 118 | Sensitivity/Specificity           | 36.1%/100%                     |                              | 46.6%/100%                |                              |                          |                         |                         |
| 119 | 95% CI                            | 0.593 - 0.750                  |                              | 0.652 - 0.796             |                              |                          |                         |                         |

120

121 RT-PCR results on SARS-CoV-2 in all clinical samples collected from symptom onset to post-recovery, up to 5 weeks or more. Pla/Ser/WB: plasma/serum/whole blood; NA: not  
 122 applicable; N: number; SD: standard deviation; CI: 95% confidence interval

123

124

125

126 **Table S5.** Sensitivity of RT-PCR with the in-house–designed *NP* gene primer set (iNP) in other samples depending on the  
 127 time interval after symptom onset.

128

129

130

131

132

133

134

135

136

137

138

139

140

141

142

143

144

145

146

147

| Days Since Symptoms                         | NP-gene (iNP)     |                   |                    |                   |                   |                    |                   |                   |                   |                   |
|---------------------------------------------|-------------------|-------------------|--------------------|-------------------|-------------------|--------------------|-------------------|-------------------|-------------------|-------------------|
|                                             | Oropharynx (N=90) |                   | Saliva (N=67)      |                   | WB/Plasma (N=77)  |                    | Urine (N=92)      |                   | Stool (N=55)      |                   |
|                                             | Ct < 35           | Ct < 40           | Ct < 35            | Ct < 40           | Ct < 35           | Ct < 40            | Ct < 35           | Ct < 40           | Ct < 35           | Ct < 40           |
| <b>Admission date</b><br>Sensitivity        | 50.0%<br>( N =12) | 83.3%<br>( N =12) | 70%<br>( N =10)    | 80.0%<br>( N =10) | 12.5%<br>( N =8)  | 37.5%<br>( N =8)   | 0%<br>( N =10)    | 10.0%<br>( N =10) | 0%<br>( N =5)     | 20.0%<br>( N =5)  |
| <b>0 – 3 days</b><br>Sensitivity            | 35.7%<br>( N =14) | 64.3%<br>( N =14) | 69.2%<br>( N =13)  | 69.2%<br>( N =13) | 18.2%<br>( N =11) | 27.3%<br>( N =11)  | 0%<br>( N =8)     | 12.5%<br>( N =8)  | 0%<br>( N =6)     | 16.7%<br>( N =6)  |
| <b>1 week(0 - 7 days)</b><br>Sensitivity    | 50.0%<br>( N =26) | 84.6%<br>( N =26) | 79.1%<br>( N =24)  | 83.3%<br>( N =24) | 10%<br>( N =20)   | 20.0%<br>( N =20)  | 0%<br>( N =22)    | 4.6%<br>( N =22)  | 6.67%<br>( N =15) | 20.0%<br>( N =15) |
| <b>2 weeks( 8 – 14 days)</b><br>Sensitivity | 20%<br>( N =25)   | 40.0%<br>( N =25) | 37.5%<br>( N =24)  | 62.5%<br>( N =24) | 12.5%<br>( N =16) | 31.3%<br>( N =16)  | 3.83%<br>( N =28) | 15.4%<br>( N =28) | 14.3%<br>( N =28) | 31.3%<br>( N =28) |
| <b>3 weeks(15 – 21 days)</b><br>Sensitivity | 5.88%<br>( N =17) | 23.5%<br>( N =17) | 27.27%<br>( N =11) | 54.6%<br>( N =11) | 6.3%<br>( N =16)  | 31.3 %<br>( N =16) | 0%<br>( N =17)    | 23.5%<br>( N =17) | 14.3%<br>( N =14) | 31.3%<br>( N =14) |
| <b>4 weeks(22 – 29 days)</b><br>Sensitivity | 0%<br>( N =8)     | 37.5%<br>( N =8)  | 0%<br>( N =4)      | 25.0%<br>( N =4)  | 25.0%<br>( N =4)  | 25.0%<br>( N =4)   | 0%<br>( N =8)     | 12.5%<br>( N =8)  | 0%<br>( N =4)     | 25.0%<br>( N =4)  |
| <b>5 weeks+(30 + days)</b><br>Sensitivity   | 9.1%<br>( N =11)  | 27.3%<br>( N =11) | 0%<br>( N =3)      | 33.3%<br>( N =3)  | 0%<br>( N =22)    | 13.6%<br>( N =22)  | 0%<br>( N =20)    | 10.0%<br>( N =20) | 0%<br>( N =9)     | 13.6%<br>( N =9)  |

Samples were segregated as follows: admission date, 0–3 days after admission, 0–7 days after admission as 1 week, 8–14 days as 2 weeks, 15–21 days as 3 weeks, 22–29 as 4 weeks, and 30+ as 5 weeks+. *N*: number of samples; WB: whole blood
